# Supplementary material
Source: PubMed Central journal article supplement (PMC9588581)
Supplement: NIHMS1832517-supplement-1.pdf [file NIHMS1832517-supplement-1.pdf]

Supplementary Figure 1, Behavioral test

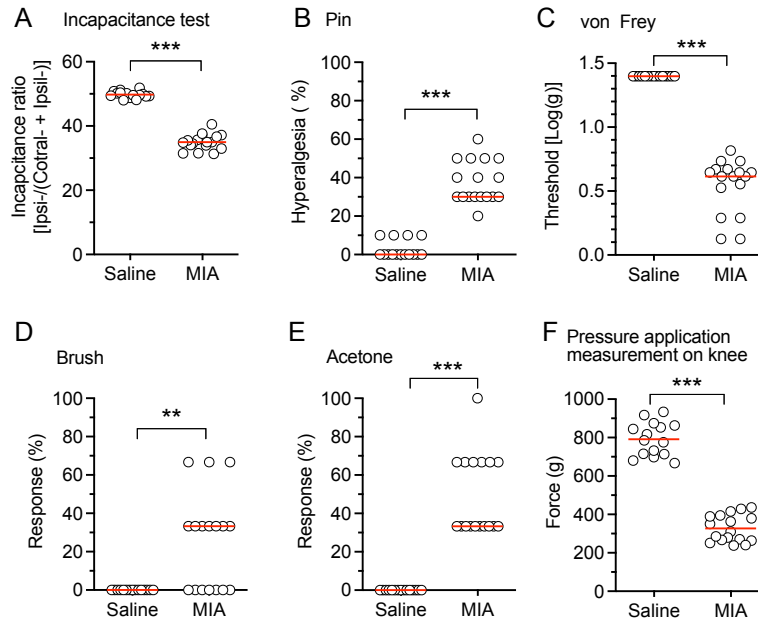

**Supplementary Table 1.** Detailed statistic results.

**Table 1-A.** Statistics for **Supplementary Figure 1.**

|              | Experimental Test    | Statistical test                       | P value |
|--------------|----------------------|----------------------------------------|---------|
| Suppl Fig.1A | Incapacitance test   | Parametric t-test                      | <0.0001 |
| Suppl Fig.1B | Pin test             | Nonparametric test (Mann–Whitney test) | <0.0001 |
| Suppl Fig.1C | von Frey             | Parametric t-test                      | <0.0001 |
| Suppl Fig.1D | Brush                | Nonparametric test (Mann–Whitney test) | =0.0078 |
| Suppl Fig.1E | Acetone              | Nonparametric test (Mann–Whitney test) | <0.0001 |
| Suppl Fig.1F | Pressure application | Parametric t-test                      | <0.0001 |

**Table 1-B.** Statistics for **Figure 1.**

|         | Experimental Test | Statistical test                       | P value |
|---------|-------------------|----------------------------------------|---------|
| Fig. 1B | SA incidence      | Chi-square                             | 0.0034  |
| Fig. 1C | SA#/bundle        | Nonparametric test (Mann–Whitney test) | 0.0003  |
| Fig. 1D | Frequency of SA   | Parametric t-test                      | 0.0114  |
| Fig. 1J | SA incidence      | Chi-square                             | <0.0001 |

**Table 1-C.** Statistics for **Figure 2.**

|                          | Statistical test                                           |                         | P value                                              |
|--------------------------|------------------------------------------------------------|-------------------------|------------------------------------------------------|
| Fig. 2B saline treatment | Nonparametric 1-way repeated measure ANOVA (Friedman test) | Friedman test, P<0.0001 | Pre- vs during, P<0.0001; Post- vs during, P<0.0001; |
| Fig. 2C MIA injection    | Nonparametric 1-way repeated measure ANOVA (Friedman test) | Friedman test, P<0.0001 | Pre- vs during, P<0.0001; Post- vs during, P<0.0001; |

**Table 1-D.** Statistics for **Figure 3.**

|                     | Statistical test             | Time (before and after GFS)       | Treatment (saline vs MIA)         | Interaction                      | P value                                                                                      |
|---------------------|------------------------------|-----------------------------------|-----------------------------------|----------------------------------|----------------------------------------------------------------------------------------------|
| Fig. 3E, knee pinch | 2-way repeated measure ANOVA | $F_{(1, 28)} = 10.39$ , P=0.0032  | $F_{(1, 27)} = 0.07887$ , P=0.781 | $F_{(1, 27)} = 12.43$ , P=0.0015 | Before and after GFS, P=0.0064 in saline group; Before and after GFS, P=0.0064 in MIA group; |
| Fig. 3F, knee bend  | 2-way repeated measure ANOVA | $F_{(1, 18)} = 8.622$ , P=0.0088  | $F_{(1, 18)} = 0.0108$ , P=0.9184 | $F_{(1, 18)} = 1.669$ , P=0.2127 | Before and after GFS, P=0.011 in MIA group                                                   |
| Fig. 3G, knee pinch | 2-way repeated               | $F_{(1, 46)} = 0.7555$ , P=0.3892 | $F_{(1, 46)} = 53.53$ , P<0.0001  | $F_{(1, 46)} = 0.359$ , P=0.5520 | Before and after GFS, P<0.0001 in saline group;                                              |

|                    |                              |                                        |                                       |                                        |                                                                                              |
|--------------------|------------------------------|----------------------------------------|---------------------------------------|----------------------------------------|----------------------------------------------------------------------------------------------|
|                    | measure ANOVA                |                                        |                                       |                                        | Before and after GFS, P<0.0001 in MIA group;                                                 |
| Fig. 3H, knee bend | 2-way repeated measure ANOVA | F <sub>(1, 45)</sub> = 87.76, P<0.0001 | F <sub>(1, 45)</sub> = 7.64, P=0.0082 | F <sub>(1, 45)</sub> = 5.439, P=0.0242 | Before and after GFS, P<0.0001 in saline group; Before and after GFS, P<0.0001 in MIA group; |

**Table 1-E. Statistics for Figure 4.**

|         | Experimental Test              | Statistical test | P value |
|---------|--------------------------------|------------------|---------|
| Fig. 4D | von Frey threshold inducing AP | t-test           | 0.0003  |

**Table 1-F. Statistics for Figure 5.**

|                           | Statistical test             | Time (before and after GFS)            | Treatment (saline vs MIA)              | Interaction                            | P value                                                                          |
|---------------------------|------------------------------|----------------------------------------|----------------------------------------|----------------------------------------|----------------------------------------------------------------------------------|
| Fig. 5B, L4 paw threshold | 2-way repeated measure ANOVA | F <sub>(1, 32)</sub> = 22.22, P<0.0001 | F <sub>(1, 32)</sub> = 58.18, P<0.0001 | F <sub>(1, 32)</sub> = 28.18, P<0.0001 | Before and after GFS, P<0.0001 in MIA group; Before GFS, saline vs MIA P<0.0001. |
| Fig. 5C                   | t-test                       |                                        |                                        |                                        | P<0.0001                                                                         |

**Table 1-G. Statistics for Figure 6.**

|                 | Statistical test             | Time (before and after GFS)            | Treatment (saline vs MIA)              | Interaction                            | P value                                                                                     |
|-----------------|------------------------------|----------------------------------------|----------------------------------------|----------------------------------------|---------------------------------------------------------------------------------------------|
| Fig. 6C, vF 8g  | 2-way repeated measure ANOVA | F <sub>(1, 17)</sub> = 27.24, P<0.0001 | F <sub>(1, 17)</sub> = 1.01, P=0.3289  | F <sub>(1, 27)</sub> = 12.43, P=0.0015 | Before and after GFS, P<0.0001 in MIA group;                                                |
| Fig. 6D, vF 16g | 2-way repeated measure ANOVA | F <sub>(1, 23)</sub> = 46.78, P<0.0001 | F <sub>(1, 23)</sub> = 1.582, P=0.2211 | F <sub>(1, 23)</sub> = 1.035, P=0.0142 | Before and after GFS, P=0.0013 in saline group; Before and after GFS, P<0.0001 in MIA group |
| Fig. 6E, vF 29g | 2-way repeated measure ANOVA | F <sub>(1, 25)</sub> = 61.37, P<0.0001 | F <sub>(1, 25)</sub> = 1.286, P=0.2675 | F <sub>(1, 25)</sub> = 2.742, P=0.1102 | Before and after GFS, P=0.0013 in saline group; Before and after GFS, P<0.0001 in MIA group |

|                     |                                       |                                     |                                        |                                             |                                                                                                                     |
|---------------------|---------------------------------------|-------------------------------------|----------------------------------------|---------------------------------------------|---------------------------------------------------------------------------------------------------------------------|
| Fig. 6F,<br>mvF 29g | 2-way<br>repeated<br>measure<br>ANOVA | $F_{(1, 23)} = 64,$<br>$P < 0.0001$ | $F_{(1, 23)} = 3.082,$<br>$P = 0.2706$ | $F_{(1, 23)} =$<br>$3.082,$<br>$P = 0.0925$ | Before and after<br>GFS, $P = 0.0003$<br>in saline group;<br>Before and after<br>GFS, $P < 0.0001$<br>in MIA group; |
|---------------------|---------------------------------------|-------------------------------------|----------------------------------------|---------------------------------------------|---------------------------------------------------------------------------------------------------------------------|

**Table 1-H.** Statistics for **Figure 7.**

|         | Experimental Test | Statistical test | P value |
|---------|-------------------|------------------|---------|
| Fig. 7E | SA incidence      | Chi-square       | <0.0001 |

**Table 1-I.** Statistics for **Figure 8.**

|                                | Experimental Test                                                   | Statistical test               | P value                          |
|--------------------------------|---------------------------------------------------------------------|--------------------------------|----------------------------------|
| Fig. 8C                        | SA incidence                                                        | Chi-square                     | 0.003                            |
| Fig. 8D<br>saline<br>treatment | Nonparametric 1-way<br>repeated measure<br>ANOVA (Friedman<br>test) | Friedman test,<br>$P < 0.0001$ | Pre- vs during,<br>$P = 0.0001;$ |
